# Supplementary material
Source: bioRxiv or medRxiv preprint supplement (https://www.biorxiv.org/highwire/filestream/106670/field_highwire_adjunct_files/5/351635-6.pdf)
Supplement: Supplementary file [file 351635-6.pdf]

**Supplementary Table 5.** CRISPR-Cas9 target sequences for multiplex genome editing of the 8 Arabidopsis *IMA* genes.

| Gene | Target sequence      | Target position in Arabidopsis genome | Strand |
|------|----------------------|---------------------------------------|--------|
| IMA1 | GTGGCATATAGTGAGAATGG | chr1:17385904                         | +      |
| IMA2 | GCGACATGTGTTGAGAATGG | chr1:17383203                         | +      |
| IMA3 | GTGAGTCACAACAACGCAGA | chr2:13108076                         | +      |
| IMA4 | GAATGAATTTTATCTCTATT | chr1:17392812                         | +      |
| IMA5 | GGAGATGTTACTTACAATAA | chr1:17391782                         | +      |
| IMA6 | GTTAGTGGTACGTGCATGAG | chr1:17389219                         | +      |
| IMA7 | GTAGTCTATGATTACGCTC  | chr2:18446551                         | +      |
| IMA8 | GATGGATGCACTCCTGCTGC | chr1:17388155                         | -      |
